# Supplementary material for: Protocol for a phase 3, randomised, active-control study of four-factor prothrombin complex concentrate versus frozen plasma in bleeding adult cardiac surgery patients requiring coagulation factor replacement: the LEX-211 (FARES-II) trial
Source: PubMed Central journal article supplement — BMJ Open. 2024 Aug 21;14(8):e091381. doi: 10.1136/bmjopen-2024-091381 (PMC11344867; doi:10.1136/bmjopen-2024-091381), 2024-08-21
Supplement: bmjopen-2024-091381.reviewer_comments.pdf [file bmjopen-2024-091381.reviewer_comments.pdf]

## PEER REVIEW HISTORY

BMJ Open publishes all reviews undertaken for accepted manuscripts. Reviewers are asked to complete a checklist review form (<http://bmjopen.bmj.com/site/about/resources/checklist.pdf>) and are provided with free text boxes to elaborate on their assessment. These free text comments are reproduced below.

## ARTICLE DETAILS

|                            |                                                                                                                                                                                                                                                |
|----------------------------|------------------------------------------------------------------------------------------------------------------------------------------------------------------------------------------------------------------------------------------------|
| <b>TITLE (PROVISIONAL)</b> | Protocol for a phase 3, randomised, active-control study of four-factor prothrombin complex concentrate versus frozen plasma in bleeding adult cardiac surgery patients requiring coagulation factor replacement: the LEX-211 (FARES-II) trial |
| <b>AUTHORS</b>             | Karkouti, Keyvan; Callum, Jeannie; Bartoszko, Justyna; Solomon, Cristina; Knaub, Sigurd; Levy, Jerrold; Tanaka, Kenichi A.; FARES II, Study Group                                                                                              |

This article was not externally reviewed at BMJ Open. Protocols that have been independently assessed prior to submission to BMJ Open are usually fast-tracked to publication on the grounds that further substantial changes will not be possible. This independent assessment will usually be external, independent review for both a substantial grant award from a non-commercial or government funder and ethics approval.
